# Supplementary material
Source: PubMed Central journal article supplement (PMC6765429)
Supplement: NIHMS1532780-supplement-6.pdf [file NIHMS1532780-supplement-6.pdf]

## Published datasets used in this study

|                                             | Data Source                                                                                                                               | Reference |
|---------------------------------------------|-------------------------------------------------------------------------------------------------------------------------------------------|-----------|
| F123 <i>in situ</i> Hi-C                    | GSE86150                                                                                                                                  | 5         |
| sNMseq                                      | GSE97179                                                                                                                                  | 6         |
| Chromatin states in mESCs                   | <a href="https://github.com/gireeshkbogu/chromatin_states_chromHMM_mm9">https://github.com/gireeshkbogu/chromatin_states_chromHMM_mm9</a> | 2         |
| Single cell Methylome in serum and 2i mESCs | GSE56879                                                                                                                                  | 7         |
| Single cell Hi-C                            | GSE94489                                                                                                                                  | 3         |
| Single cell Hi-C                            | GSE84920                                                                                                                                  | 8         |

## Supplementary References

1. DeMaere, M.Z. & Darling, A.E. Sim3C: simulation of Hi-C and Meta3C proximity ligation sequencing technologies. *GigaScience* **7**(2017).
2. Bogu, G.K. *et al.* Chromatin and RNA Maps Reveal Regulatory Long Noncoding RNAs in Mouse. *Molecular and Cellular Biology* **36**, 809 (2016).
3. Nagano, T. *et al.* Cell-cycle dynamics of chromosomal organization at single-cell resolution. *Nature* **547**, 61-67 (2017).
4. Yang, T. *et al.* HiCRep: assessing the reproducibility of Hi-C data using a stratum- adjusted correlation coefficient. *Genome Research* (2017).
5. Fang, R. *et al.* Mapping of long-range chromatin interactions by proximity ligation-assisted ChIP-seq. *Cell Research* **26**, 1345 (2016).
6. Luo, C. *et al.* Single-cell methylomes identify neuronal subtypes and regulatory elements in mammalian cortex. *Science* **357**, 600 (2017).
7. Smallwood, S.A. *et al.* Single-cell genome-wide bisulfite sequencing for assessing epigenetic heterogeneity. *Nature Methods* **11**, 817 (2014).
8. Ramani, V. *et al.* Massively multiplex single-cell Hi-C. *Nat Methods* **14**, 263-266 (2017).
